# Supplementary material for: The Degradability of Microplastics May Not Necessarily Equate to Environmental Friendliness: A Case Study of Cucumber Seedlings with Disturbed Photosynthesis
Source: MDPI journal article supplement (doi:10.3390/agriculture14010053), 2023-12-27
Supplement: s1 [file s1]

**Table S1.** Definition of chlorophyll fluorescence parameters in this study

| Technical fluorescence parameters                | Definitions                                                                 |
|--------------------------------------------------|-----------------------------------------------------------------------------|
| F <sub>o</sub>                                   | Initial fluorescence yield                                                  |
| F <sub>m</sub>                                   | Maximum fluorescence yield                                                  |
| F <sub>v</sub> = F <sub>m</sub> – F <sub>o</sub> | Maximum variable fluorescence                                               |
| F <sub>v</sub> /F <sub>m</sub>                   | Maximum photochemical efficiency                                            |
| M <sub>o</sub>                                   | Initial slope of the O–J fluorescence rise                                  |
| VJ                                               | Energy dissipation ratio of electrons passing through plastid quinone A (Q) |
| ABS/RC=M <sub>o</sub> ×(1/VJ) ×(1 /φP0)          | Light energy absorbed by the unit reaction center                           |
| TRo/RC=M <sub>o</sub> ×(1/VJ)                    | Energy captured by the unit reaction center for reducing Q <sub>A</sub>     |
| ETO/RC=M <sub>o</sub> ×(1/VJ) ×ψO                | Energy captured by a unit reaction center for electron transfer             |
| DIO/RC=(ABS/RC)–( TRO / RC)                      | Energy dissipated in the unit reaction center                               |

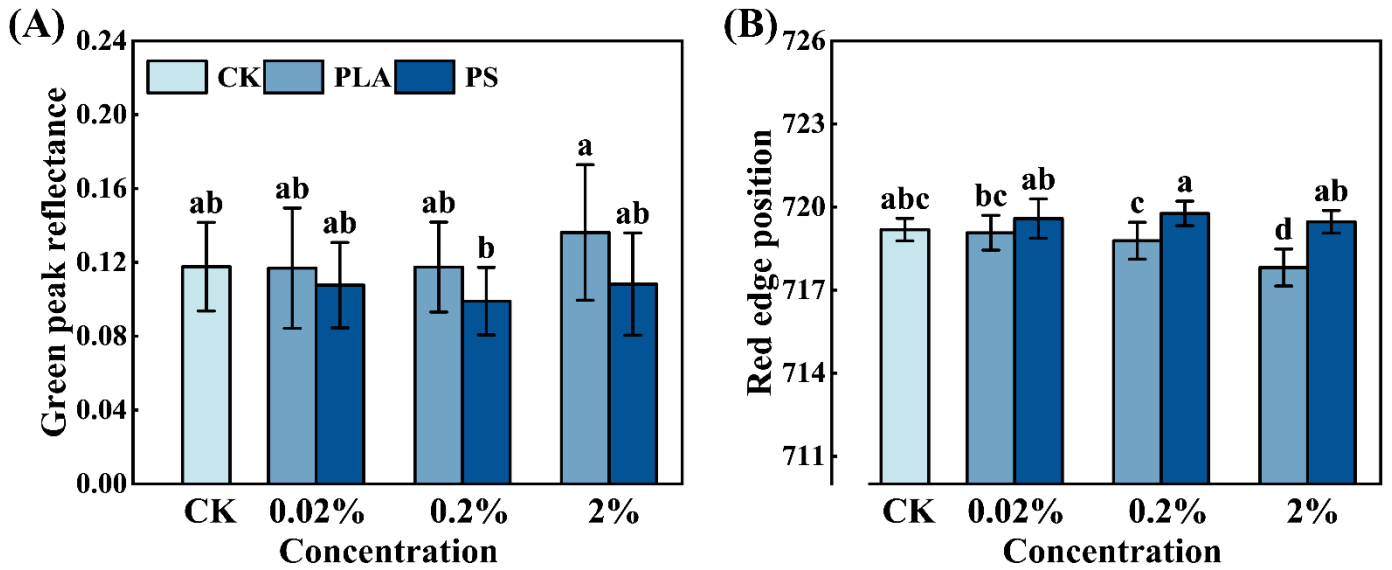

**Figure S1.** Spectral response of cucumber seedlings to MPs exposure. (A): the Green peak reflectance; (B): red edge position. The lowercase letters indicate the significance of the difference between the mean values in different treatments at the 0.05 level.
