# Supplementary material for: The Degradability of Microplastics May Not Necessarily Equate to Environmental Friendliness: A Case Study of Cucumber Seedlings with Disturbed Photosynthesis
Source: MDPI journal article supplement (doi:10.3390/agriculture14010053), 2023-12-27
Supplement: s1 [file s1]

Archive with 1 entries (1 files):
- agriculture-2763011-supplementary.pdf
